## POLYMORPHIC SITES AND THE MECHANISM OF EVOLUTION IN HUMAN MITOCHONDRIAL DNA

REBECCA L. CANN,\* WESLEY M. BROWN\*<sup>†</sup> AND ALLAN C. WILSON\*

\* *Department of Biochemistry, University of California, Berkeley, California 94720; and* <sup>†</sup> *Division of Biological Sciences, University of Michigan, Ann Arbor, Michigan 48109*

Manuscript received August 15, 1983

Revised copy accepted November 12, 1983

### ABSTRACT

Twelve restriction enzymes were used to screen for the presence or absence of cleavage sites at 441 locations in the mitochondrial DNA of 112 humans from four continents. Cleavage maps were constructed by comparison of DNA fragment sizes with those expected from the published sequence for one human mtDNA. One hundred and sixty-three of the sites were polymorphic, *i.e.*, present in some individuals but absent from others, 278 sites being invariant. These polymorphisms probably result from single base substitutions and occur in all functional regions of the genome.—In 77 cases, it was possible to specify the exact nature and location (within a restriction site) of the mutation responsible for the absence of a restriction site in a known human mtDNA sequence and its presence in another human mtDNA. Fifty-two of these 77 gain mutations occur in genes coding for proteins, 34 being silent and 18 causing amino acid replacements; moreover, nine of the replacements are radical.—Notable also is the anomalous ratio of transitions to transversions required to account for these 77 restriction site differences between the known human mtDNA sequences and other human mtDNAs. This ratio is lower for most groups of restriction sites than has been reported from sequence comparisons of limited parts of the mtDNA genome in closely related mammals, perhaps indicating a special functional role or sensitivity to mutagenesis for palindromic regions containing high levels of guanine and cytosine.—From the genomic distribution of the 163 polymorphic sites, it is inferred that the level of point mutational variability in tRNA and rRNA genes is nearly as high as in protein-coding genes but lower than in noncoding mtDNA. Thus, the functional constraints operating on components of the protein-synthetic apparatus may be lower for mitochondria than for other systems. Furthermore, the mitochondrial genes for tRNAs that recognize four codons are more variable than those recognizing only two codons.—Among the more variable of the human mitochondrial genes coding for proteins is that for subunit 2 of cytochrome oxidase; this polypeptide appears to have been evolving about five times faster in primates than in other mammals. Cytochrome *c*, a nuclear encoded protein that interacts directly with the oxidase 2 subunit in electron transport, has also evolved faster in primates than in rodents or ungulates. This example, along with that for the mitochondrial rRNA genes and the nuclear genes coding for mitochondrial ribosomal proteins, provides evidence for coevolution between specific nuclear and mitochondrial genes.

**C**OMPARISON of cleavage maps made by the double-digestion method has proved valuable for estimating the degree of divergence among the mitochondrial genomes of animals. It was with this method that BROWN, GEORGE

and WILSON (1979) detected the rapid divergence of mtDNA relative to nuclear DNA, a phenomenon confirmed by later sequencing studies (BROWN *et al.* 1982). A more accurate method of restriction mapping, termed the high-resolution method, becomes possible when one complete nucleotide sequence has been determined for a species and when the mean extent of divergence between individuals is  $<2\%$ . With this method, one usually can map restriction sites to within  $\pm 2$  base pairs (bp) (CANN, BROWN and WILSON 1982); the double-digestion method, by contrast, has an average error of  $\pm 200$  bp (CANN, BROWN and WILSON 1982; CANN 1982).<sup>1</sup> Because of the availability of a complete sequence for one human mtDNA (ANDERSON *et al.* 1981), it is now possible, with the high-resolution mapping method, to examine the types and incidences of mutations at hundreds of sites throughout the mitochondrial genomes of numerous individuals in the human population (CANN, BROWN and WILSON 1982; CANN and WILSON 1983). A comparable opportunity exists for mouse and cow mtDNAs (see, for example, FERRIS *et al.* 1983b). This paper shows how such variability studies with human mtDNAs allow testing of hypotheses concerning the mechanisms of mtDNA evolution. A preliminary account of this work has appeared (CANN, BROWN and WILSON 1982), as has a description of the length-mutational differences among these mtDNAs (CANN and WILSON 1983).

#### MATERIALS AND METHODS

*Human individuals and mtDNA preparation:* MtDNA was highly purified from placenta, liver or tissue culture cells derived from 112 human beings as described by BROWN (1980), CANN (1982) and CANN and WILSON (1983). These individuals represent four broad geographic categories, as follows: 12 Australian aborigines, 19 people of African descent, 35 of Asian descent and 45 from Europe, North Africa or the Middle East; they included the 21 individuals studied by BROWN (1980). Two of the samples were from twins, and one was from a cell line (HeLa S3).

*Restriction mapping:* Each of the purified mtDNAs was digested with 12 restriction endonucleases: (a) *AluI*, (b) *AvaII*, (c) *DdeI*, (d) *FnuDII*, (e) *HaeIII*, (f) *HhaI*, (g) *HinfI*, (h) *HpaI*, (i) *HpaII*, (j) *MboI*, (k) *RsaI* and (l) *TaqI*. The enzymes were purchased from New England BioLabs or Bethesda Research Laboratories and used under conditions specified by the supplier. DNA fragments generated by endonuclease digestion were labeled at the ends with <sup>32</sup>P according to published descriptions (DROUIN and SYMONS 1979; BROWN 1980) and electrophoresed at room temperature into vertical gels containing 3.5% polyacrylamide (40 × 15 × 0.08 cm, 0.05 M Tris, 0.05 M boric acid and 0.001 M EDTA at pH 8.3) or 1.2% agarose (20 × 15 × 0.10 cm, 0.04 M Tris, 0.02 M sodium acetate and 0.02 M EDTA at pH 7.5). Autoradiography was done on vacuum-dried gels by standard methods (BROWN 1980; MANIATIS, FRITSCH and SAMBROOK 1982). The sizes of the fragments were estimated by comparison with cleavage fragments of phage DNAs ( $\phi$ X174 and PM2) and with those of the human mtDNA whose sequence is completely known (ANDERSON *et al.* 1981). By considering these fragment sizes in relation to those predicted by the known sequence, we constructed cleavage maps. The rationale and application of this mapping method has been presented before (CANN, BROWN and WILSON 1982; CANN and WILSON 1983; FERRIS *et al.* 1983a,b).

#### RESULTS

*Locations of variable sites:* Table 1 lists the 163 variable sites detected in our survey of 112 human mtDNAs and the functional regions in which these sites

<sup>1</sup> Although it has been suggested that side-by-side comparisons of fragments made in the same electrophoretic gel can improve the accuracy of mapping restriction sites (FERRIS, WILSON and BROWN 1981; FERRIS *et al.* 1981), we want to emphasize that this practice improves only the ordering of such sites and not the precision of their placement in the genome.

TABLE 1

*Locations and nature of 163 variable restriction sites in 113 human mtDNAs*

| Location and nature of site      |                          |                                         |                                        |
|----------------------------------|--------------------------|-----------------------------------------|----------------------------------------|
| Position and enzyme <sup>a</sup> | Base change <sup>b</sup> | No. of variant individuals <sup>c</sup> | No. of inferred mutations <sup>d</sup> |
| D loop                           |                          |                                         |                                        |
| 8j                               | 9, G-A                   | 11                                      | 6                                      |
| 134 l                            | 135, T-C                 | 1                                       | 1                                      |
| 5' Noncoding                     |                          |                                         |                                        |
| 255f                             | 257, A-G                 | 1                                       | 1                                      |
| 259a                             | 262, C-T                 | 1                                       | 1                                      |
| 340j                             | 340, C-G                 | 1                                       | 1                                      |
| 12S RNA                          |                          |                                         |                                        |
| 663e                             | 663, A-G                 | 3                                       | 2                                      |
| 707i                             | 710, T-G                 |                                         |                                        |
| or                               | or                       | 1                                       | 1                                      |
| 712i                             | 714, A-G                 |                                         |                                        |
| 719j                             | 720, T-A                 | 1                                       | 1                                      |
| 740j                             | 740-3                    | 4                                       | 3                                      |
| 1240a                            | 1241, C-G                | 3                                       | 3                                      |
| 1403a                            | 1404, A-G                | 17                                      | 8                                      |
| 1463e                            | 1463-6                   | 1                                       | 1                                      |
| 1484e                            | 1484, G-C                | 34                                      | 19                                     |
| Val tRNA                         |                          |                                         |                                        |
| 1610a                            | 1610-3                   | 6                                       | 5                                      |
| 1637c                            | 1637-41                  | 3                                       | 3                                      |
| 1667c                            | 1667-71                  | 1                                       | 1                                      |
| 16S rRNA                         |                          |                                         |                                        |
| 1715c                            | 1715-9                   | 2                                       | 2                                      |
| 1917a                            | 1917-21                  | 1                                       | 1                                      |
| 2208a                            | 2208-11                  | 1                                       | 1                                      |
| 2472a                            | 2473, A-G                | 1                                       | 1                                      |
| 2635a                            | 2635, G-A                | 1                                       | 1                                      |
| 2734a                            | 2734-7                   | 6                                       | 5                                      |
| 2758k                            | 2758-61                  | 7                                       | 3                                      |
| 2849k                            | 2849-52                  | 2                                       | 2                                      |
| 3090e                            | 3092, T-C                | C                                       | C                                      |
| Leu <sup>UUR</sup> tRNA          |                          |                                         |                                        |
| 3250g                            | 3250, T-G                | 9                                       | 6                                      |
| Urf 1                            |                          |                                         |                                        |
| 3315e                            | 3315-8                   | 2                                       | 1                                      |
| 3391e                            | 3394, T-C, R             | 3                                       | 3                                      |
| 3537a                            | 3537-40                  | 1                                       | 1                                      |

<sup>a</sup> Each variable site is referred to by the nucleotide position with which it starts in the light strand of the Cambridge sequence (ANDERSON *et al.* 1981) and by a single letter (a-l), which designates the enzyme recognizing that site. The correspondence between letter and enzyme is alphabetical (see MATERIALS AND METHODS for the alphabetical list of enzymes).

<sup>b</sup> The position of each base change is indicated, followed by the nature of the substitution (for site gains relative to the Cambridge sequence). In the cases of sites 16303k and 16310k, they are gains relative to the sequences published by GREENBERG NEWBOLD, and SUGINO. (1983) but losses relative to the Cambridge sequence. Finally, R and S refer to amino acid replacement and silent substitutions.

<sup>c</sup> C refers to the Cambridge nucleotide sequence (ANDERSON *et al.* 1981).

<sup>d</sup> Inferred by phylogenetic analysis using the tree topology shown in Figure 5 of CANN and WILSON (1983).

TABLE 1—Continued

| Location and nature of site      |                          |                                         |                                        |
|----------------------------------|--------------------------|-----------------------------------------|----------------------------------------|
| Position and enzyme <sup>a</sup> | Base change <sup>b</sup> | No. of variant individuals <sup>c</sup> | No. of inferred mutations <sup>d</sup> |
| 3563g                            | 3566, C-T, R             | C                                       | C                                      |
| 3592h                            | 3593, C-T, S             | 12                                      | 4                                      |
| 3842e                            | 3843, A-G, S             | 1                                       | 1                                      |
| 3849e                            | 3849-52                  | 2                                       | 2                                      |
| 3899l                            | 3899-902                 | 9                                       | 9                                      |
| 3930c                            | 3930-4                   | C                                       | C                                      |
| 4092g                            | 4095, C-T, S             | 1                                       | 1                                      |
| Met tRNA                         |                          |                                         |                                        |
| 4411a                            | 4411-4                   | 4                                       | 4                                      |
| Urf 2                            |                          |                                         |                                        |
| 4631a                            | 4631-4                   | 1                                       | 1                                      |
| 4769a                            | 4769-72                  | C                                       | C                                      |
| 4793e                            | 4793, A-G, S             | 2                                       | 2                                      |
| 5009k                            | 5009, A-G, S             | 8                                       | 5                                      |
| 5176a                            | 5176-9                   | 6                                       | 4                                      |
| 5261e                            | 5261-4                   | 1                                       | 1                                      |
| 5269l                            | 5269-72                  | 1                                       | 1                                      |
| 5351f                            | 5351, A-G, S             | 3                                       | 2                                      |
| Trp tRNA                         |                          |                                         |                                        |
| 5552c                            | 5552-6                   | 1                                       | 1                                      |
| L strand origin                  |                          |                                         |                                        |
| 5742i                            | 5742-5                   | 2                                       | 2                                      |
| 5754i                            | 5755, G-C                |                                         |                                        |
| or                               | or                       | 1                                       | 1                                      |
| 5756i                            | 5756, G-C                |                                         |                                        |
| CO 1                             |                          |                                         |                                        |
| 5978a                            | 5978-81                  | 1                                       | 1                                      |
| 5983g                            | 5984, A-G } S            | 1                                       | 1                                      |
| 5984b                            | 5984, A-G } S            |                                         |                                        |
| 5996a                            | 5996-9                   | 1                                       | 1                                      |
| 6022a                            | 6022-5                   | 1                                       | 1                                      |
| 6145g                            | 6149, A-C, S             | C                                       | C                                      |
| 6211g                            | 6211-5                   | 6                                       | 2                                      |
| 6356c                            | 6357, C-T, S             | 2                                       | 2                                      |
| 6425e                            | 6425, G-T, S             | 2                                       | 1                                      |
| 6501i                            | 6503, A-G, S             | 1                                       | 1                                      |
| 6871g                            | 6871-5                   | 2                                       | 2                                      |
| 6931g                            | 6931-5                   | 1                                       | 1                                      |
| 6957e                            | 6957-60                  | 2                                       | 2                                      |
| 7025a                            | 7028, C-T, S             | 25                                      | 6                                      |
| 7055a                            | 7055-8                   | 3                                       | 1                                      |
| 7335l                            | 7335-8                   | 5                                       | 4                                      |
| Ser <sup>UCN</sup> tRNA          |                          |                                         |                                        |
| 7458g                            | 7458-62                  | C                                       | C                                      |
| 7461l                            | 7461-4                   | 1                                       | 1                                      |
| 7474a                            | 7474-7                   | 1                                       | 1                                      |
| CO 2                             |                          |                                         |                                        |
| 7617f                            | 7617, A-G, R             | 2                                       | 2                                      |
| 7750c                            | 7750-4                   | 11                                      | 5                                      |
| 7859j                            | 7859-62                  | 1                                       | 1                                      |

TABLE 1—Continued

| Location and nature of site      |                          |                                         |                                        |
|----------------------------------|--------------------------|-----------------------------------------|----------------------------------------|
| Position and enzyme <sup>a</sup> | Base change <sup>b</sup> | No. of variant individuals <sup>c</sup> | No. of inferred mutations <sup>d</sup> |
| 7897k                            | 7897-900                 | 10                                      | 6                                      |
| 7912k                            | 7912-5                   | 3                                       | 2                                      |
| 7970g                            | 7973, C-T, R             | C                                       | C                                      |
| 7986g                            | 7986-90                  | 7                                       | 5                                      |
| 8165e                            | 8167, T-C, S             | 1                                       | 1                                      |
| 8249b                            | 8251, G-T or A, S        | 1                                       | 1                                      |
| 8250e                            | 8250-3                   | 2                                       | 1                                      |
| UrfA6L                           |                          |                                         |                                        |
| 8391e                            | 8391-4                   | 1                                       | 1                                      |
| ATPase 6                         |                          |                                         |                                        |
| 8592j                            | 8592-5                   | 2                                       | 2                                      |
| 8723b                            | 8724, A-G, S             | 1                                       | 1                                      |
| 8783g                            | 8783-7                   | 2                                       | 1                                      |
| 8877f                            | 8877, G-T, R             | 1                                       | 1                                      |
| 8994e                            | 8994-7                   | 2                                       | 1                                      |
| 9009a                            | 9009, C-A, S             | 2                                       | 1                                      |
| 9053f                            | 9053-6                   | 12                                      | 8                                      |
| 9070l                            | 9072, A-G, S             | 3                                       | 2                                      |
| 9150j                            | 9150, A-G, S             | 3                                       | 2                                      |
| CO 3                             |                          |                                         |                                        |
| 9266e                            | 9266-9                   | 1                                       | 1                                      |
| 9294e                            | 9294-7                   | 1                                       | 1                                      |
| 9380f                            | 9380-3                   | C                                       | C                                      |
| 9400f                            | 9402, G-A, R             | 1                                       | 1                                      |
| 9509k                            | 9509, T-G, R             | C                                       | C                                      |
| 9553e                            | 9553-6                   | 2                                       | 2                                      |
| 9714e                            | 9716, T-C, S             | 1                                       | 1                                      |
| 9751l                            | 9751-4                   | 1                                       | 1                                      |
| 9859g                            | 9860, C-A, R             | 1                                       | 1                                      |
| Urf 3                            |                          |                                         |                                        |
| 10066f                           | 10066, T-G, R            | 1                                       | 1                                      |
| 10084l                           | 10086, A-G, R            | 1                                       | 1                                      |
| 10352a                           | 10355, T-C, S            | C                                       | C                                      |
| 10364e                           | 10364-7                  | 1                                       | 1                                      |
| 10394c                           | 10398, A-G, R            | 47                                      | 18                                     |
| Arg tRNA                         |                          |                                         |                                        |
| 10413a                           | 10415, T-C               | 5                                       | 5                                      |
| Urf 4L                           |                          |                                         |                                        |
| 10689e                           | 10689-92                 | 1                                       | 1                                      |
| 10694a                           | 10697, C-T, S            | 1                                       | 1                                      |
| 10725e                           | 10725-8                  | 3                                       | 3                                      |
| Urf 4                            |                          |                                         |                                        |
| 10771j                           | 10771, A-G, S            | 6                                       | 5                                      |
| 10806g                           | 10810, T-C, S            | 8                                       | 1                                      |
| 10893l                           | 10895, A-G, R            | 1                                       | 1                                      |
| 10933b                           | 10933, C-G, S            | 2                                       | 2                                      |
| 11146c                           | 11149, A-G, S            | 1                                       | 1                                      |
| 11161i                           | 11164, A-G, S            | 2                                       | 1                                      |
| 11329e                           | 11329, A-G, S            | 2                                       | 2                                      |
| 11350a                           | 11350-3                  | 2                                       | 2                                      |

| Location and nature of site      |                          |                                         |                                        |
|----------------------------------|--------------------------|-----------------------------------------|----------------------------------------|
| Position and enzyme <sup>a</sup> | Base change <sup>b</sup> | No. of variant individuals <sup>c</sup> | No. of inferred mutations <sup>d</sup> |
| 11447k                           | 11447-50                 | 3                                       | 3                                      |
| 11922j                           | 11922-5                  | 1                                       | 1                                      |
| Urf 5                            |                          |                                         |                                        |
| 12406h                           | 12406-11                 | 3                                       | 3                                      |
| 12560a                           | 12560-3                  | 3                                       | 3                                      |
| 12795j                           | 12796, C-A, R            |                                         |                                        |
| or                               | or                       | 4                                       | 4                                      |
| 12798j                           | 12798, C-G, S            |                                         |                                        |
| 12925g                           | 12928, C-T, R            | 1                                       | 1                                      |
| 13031g                           | 13031-5                  | 49                                      | 19                                     |
| 13051e                           | 13051-4                  | 5                                       | 3                                      |
| 13100i                           | 13101, A-C, S            | 1                                       | 1                                      |
| 13103g                           | 13103-7                  | 1                                       | 1                                      |
| 13182j                           | 13182, T-G, F            | 1                                       | 1                                      |
| 13208f                           | 13208-11                 | 6                                       | 5                                      |
| 13367b                           | 13367-71                 | 4                                       | 3                                      |
| 13404l                           | 13404-7                  | 3                                       | 2                                      |
| 13641l                           | 13644, C-A, S            | 3                                       | 2                                      |
| 13702e                           | 13702-5                  | 4                                       | 2                                      |
| 14015a                           | 14015-9                  | 1                                       | 1                                      |
| Urf 6                            |                          |                                         |                                        |
| 14279j                           | 14281, C-T, S            | 1                                       | 1                                      |
| 14322a                           | 14324, T-C, R            | 1                                       | 1                                      |
| 14394c                           | 14398, A-G, S            | 1                                       | 1                                      |
| 14439g                           | 14442, T-A, R            | C                                       | C                                      |
| 14509a                           | 14510, G-A, R            | C                                       | C                                      |
| 14608c                           | 14608-12                 | 1                                       | 1                                      |
| Cyt b                            |                          |                                         |                                        |
| 14749e                           | 14750, A-G, R            | 1                                       | 1                                      |
| 14869j                           | 14869-72                 | 1                                       | 1                                      |
| 14956l                           | 14956-9                  | 2                                       | 1                                      |
| 15005g                           | 15006, C-A, R            | 2                                       | 1                                      |
| 15172e                           | 15172-5                  | 1                                       | 1                                      |
| 15234g                           | 15234-8                  | 1                                       | 1                                      |
| 15235j                           | 15235, A-G, S            | 1                                       | 1                                      |
| 15238c                           | 15238-42                 | 2                                       | 1                                      |
| 15250c                           | 15250-4                  | 13                                      | 7                                      |
| 15723g                           | 15723-7                  | 1                                       | 1                                      |
| 15883e                           | 15883-6                  | 4                                       | 3                                      |
| Noncoding                        |                          |                                         |                                        |
| 15885i                           | 15887, T-G               | 1                                       | 1                                      |
| Thr tRNA                         |                          |                                         |                                        |
| 15925i                           | 15925-8                  | 3                                       | 3                                      |
| Pro tRNA                         |                          |                                         |                                        |
| 15996c                           | 15996-16000              | 1                                       | 1                                      |
| 16000g                           | 16000-4                  |                                         |                                        |
| D loop                           |                          |                                         |                                        |
| 16049k                           | 16049-52                 | 1                                       | 1                                      |
| 16065g                           | 16065-9                  | 2                                       | 1                                      |
| 16130k                           | 16130-3                  | 24                                      | 16                                     |

| Location and nature of site      |                          |                                         |                                        |
|----------------------------------|--------------------------|-----------------------------------------|----------------------------------------|
| Position and enzyme <sup>a</sup> | Base change <sup>b</sup> | No. of variant individuals <sup>c</sup> | No. of inferred mutations <sup>d</sup> |
| 16208k                           | 16208-11                 | 6                                       | 4                                      |
| 16246g                           | 16246, A-G               | 1                                       | 1                                      |
| 16303k                           | 16304, T-C               | 12                                      | 4                                      |
| 16310k                           | 16311, T-C               | 36                                      | 14                                     |
| 16373j                           | 16375, C-T               | 1                                       | 1                                      |
| 16390b                           | 16390-4                  | 11                                      | 5                                      |
| 16398e                           | 16399, A-G               | 8                                       | 7                                      |
| 16490g                           | 16491, T-A               | 1                                       | 1                                      |
| 16517e                           | 16519, T-C               | 39                                      | 17                                     |

occur; it does not include the 278 constant sites, since they can be inferred from the published sequence (ANDERSON *et al.* 1981). The approximate locations of many of these variable and constant sites were given by CANN, BROWN and WILSON (1982) and CANN and WILSON (1983), and an updated and revised illustration appears in Figure 1.

In only three cases does it appear that these polymorphisms are not independent events. Individual 71 has two overlapping site changes, the loss of the *Hinf*I site (GAGTC) which starts at position 5983 and the gain of an *Ava*II site (GG<sub>T</sub>ACC) at position 5984 (see Table 1). One mutation, a A → G transition (GAGTCC → GGGTCC), is sufficient to cause the simultaneous loss of the *Hinf*I site and gain of the *Ava*II site. Similarly, in individual 21 it is likely that a base substitution creating an *Ava*II site at 8251 has caused the *Hae*III loss at 8250. The third possible case involves the loss of both a *Dde*I site and a *Hinf*I site in individual 59, which could be the result of a base substitution at position 16000. Hence, 160 variable base-pair positions may account for the 163 variable restriction sites encountered in our survey.

With the exception of the glutamate and aspartate tRNA genes, all of the known mtDNA genes contained restriction sites for the endonucleases used here. Furthermore, the number of sites is highly correlated with the number of base pairs per gene (Figure 2).

As is apparent from Tables 2 and 3, all the major classes of functional regions of the human mitochondrial genome have been the focus of base substitution. Table 2 summarizes the variation for each major functional region in two ways: by giving, first, the percentage of the sites that vary and, second, the number of phylogenetically inferred mutations per site. The second method of estimation comes from a tree analysis that is based on the parsimony principle and on the assumption of strictly maternal transmission and clonal divergence of mtDNAs; the tree appears in CANN and WILSON (1983). According to these approaches, the noncoding regions are 1.4 to 2.8 times more variable than the protein-coding regions, which are slightly more variable, on average, than the tRNA and rRNA genes.

Table 3 gives more information about variability among the 13 regions coding for proteins. In three cases (*i.e.*, Urfs 6, 4L and A6L) the variability

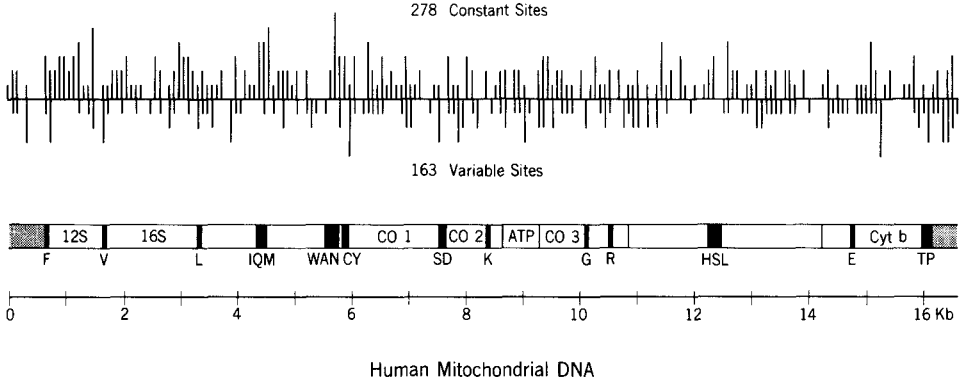

FIGURE 1.—Locations of cleavage sites and functional regions in human mtDNA. The 16,569-bp circular genome sequenced by ANDERSON *et al.* (1981) is drawn in linear form. The major bar shows the regions of known function: 22 tRNA genes, each represented by a single letter and black shading, two rRNA genes (12S and 16S), and 13 genes coding for proteins, eight of which are unidentified and five of which are known, namely, three cytochrome oxidase subunits (CO 1, 2 and 3), one ATPase subunit (ATP) and cytochrome *b* (Cyt *b*). Dotted areas represent the large noncoding region, extending from 16,024 to 576 bp. The upper panel shows the locations of cleavage sites found in mtDNAs from 112 humans plus the Cambridge reference sequence with the aid of 12 restriction enzymes. Vertical lines *below* the horizontal line show the variable sites, *i.e.*, those present in some but not all of these mtDNAs. The vertical lines *above* the horizontal line show those sites present in all of the human mtDNAs examined. Height of the vertical lines is proportional to the number of sites found within an 80-bp segment. Preliminary versions of this figure have appeared in CANN, BROWN and WILSON (1982) and CANN and WILSON (1983).

estimates are based on too few sites to be reliable. Among the remaining ten cases, the most variable are Urf 3, Urf 5, subunit II of cytochrome oxidase and subunit 6 of ATPase.

Among tRNA genes, those recognizing four codons are significantly more variable than those that recognize only a pair of codons (Table 4). The apparent difference in variability between the two subclasses of tRNA recognizing a pair of codons—namely, codons ending with a purine (NNR) and codons ending with a pyrimidine (NNY)—is not statistically significant.

*Analysis of site gains:* The exact position and nature of those base substitutions that account for the presence of a restriction site in a given mtDNA and its absence in a known sequence can usually be inferred with considerable confidence (see Table 1). This is because the human mtDNAs being compared are so closely related that the number of substitutions per restriction site is very unlikely to be more than one.

Fifty-two of the 77 substituted positions leading to site gains occur in regions coding for proteins. Of these, 34 are due to silent substitutions (which do not result in amino acid substitutions), a proportion (65%) like that observed when the Urf 5 region of humans and their closest living relatives, the great apes (BROWN *et al.* 1982), were sequenced. Table 5 lists the 18 amino acid replacements inferred from the site gains. Six mitochondrially encoded proteins have apparently undergone multiple amino acid replacements, namely, Urfs 1, 3 and 6, subunits 2 and 3 of cytochrome oxidase and cytochrome *b*.



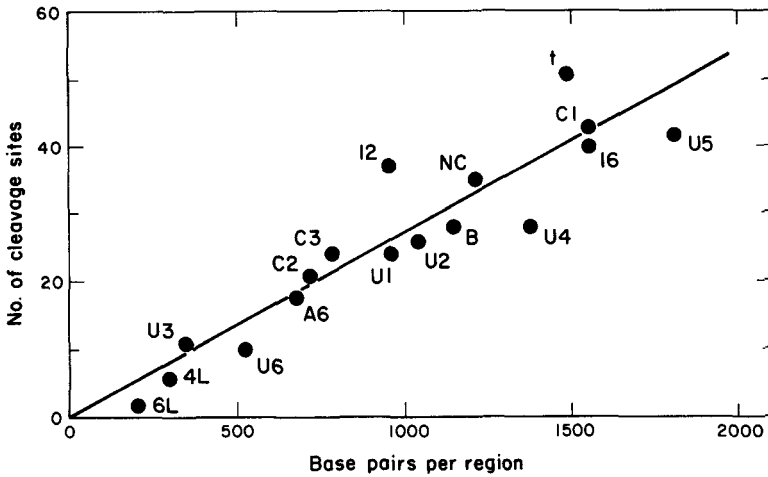

FIGURE 2.—Distribution of 441 cleavage sites among 17 regions for 113 human mtDNAs. The abbreviations are as follows: A for adenosine triphosphatase, B for cytochrome *b*, C for cytochrome oxidase, NC for noncoding region (including the D loop), t for all the transfer RNAs, U for unidentified reading frame, 12 for 12S ribosomal RNA, 16 for 16S ribosomal RNA; 4L and 6L also refer to unidentified reading frames. The lengths of these regions in base pairs are taken from ANDERSON *et al.* (1981).

TABLE 2  
Summary of variability by function

| Function      | Base pairs | Variable sites |                 | Inferred changes (c) | Variability |         |
|---------------|------------|----------------|-----------------|----------------------|-------------|---------|
|               |            | (a)            | Total sites (b) |                      | 100 a/b     | 100 c/b |
| Ribosomal RNA | 2,511      | 17             | 77              | 54                   | 22          | 70      |
| Transfer RNA  | 1,490      | 13             | 50              | 33                   | 26          | 66      |
| Protein       | 11,354     | 113            | 279             | 245                  | 41          | 88      |
| Noncoding     | 1,214      | 20             | 35              | 86                   | 57          | 246     |
| Total         | 16,569     | 163            | 441             | 418                  | 37          | 95      |

Nine of these replacements are radical, because they involve substantial changes in size, composition and polarity (GRANTHAM 1974).

The apparent ratio of transitions to transversions is 2.5:1 for gain mutations in human mtDNA, as shown in Table 6. This is significantly less than the ratio observed by sequence comparisons of an 896-bp segment among African hominoid mtDNAs (11:1, BROWN *et al.* 1982), the cytochrome oxidase II genes of two rat species (8:1, BROWN and SIMPSON 1982) and a 900-bp segment from the noncoding region from several humans (24:1, GREENBERG, NEWBOLD and SUGINO 1983). The proportion of transitions is strongly dependent on the frequency of occurrence of the restriction site (Table 7), and sites that are poorly represented in human mtDNA appear to have a particularly low ratio of transitions to transversions (1.5:1).

TABLE 3

*Site variability related to function for protein-coding regions*

| Region           | Base pairs | Variable sites (a) | Total sites (b) | Inferred mutations (c) | Variability |         | Rank based on sites <sup>a</sup> | Rank based on inferred mutations <sup>a</sup> |
|------------------|------------|--------------------|-----------------|------------------------|-------------|---------|----------------------------------|-----------------------------------------------|
|                  |            |                    |                 |                        | 100 a/b     | 100 c/b |                                  |                                               |
| Many sites (>10) |            |                    |                 |                        |             |         |                                  |                                               |
| Urf 3            | 346        | 5                  | 11              | 22                     | 45          | 200     | 3                                | 1                                             |
| Urf 5            | 1811       | 15                 | 39              | 51                     | 38          | 131     | 5                                | 2                                             |
| CO 2             | 718        | 10                 | 21              | 25                     | 48          | 119     | 2                                | 3                                             |
| ATPase 6         | 678        | 9                  | 18              | 19                     | 50          | 106     | 1                                | 4                                             |
| Urf 1            | 957        | 10                 | 24              | 24                     | 42          | 100     | 4                                | 5                                             |
| Cyt b            | 1144       | 11                 | 28              | 19                     | 39          | 68      | 5                                | 6                                             |
| Urf 4            | 1374       | 10                 | 28              | 19                     | 36          | 68      | 7                                | 6                                             |
| CO 1             | 1552       | 16                 | 43              | 27                     | 37          | 63      | 6                                | 8                                             |
| Urf 2            | 1041       | 8                  | 26              | 17                     | 31          | 65      | 8                                | 7                                             |
| CO 3             | 783        | 9                  | 24              | 10                     | 38          | 42      | 5                                | 9                                             |
| Few sites (≤10)  |            |                    |                 |                        |             |         |                                  |                                               |
| Urf 6            | 522        | 6                  | 10              | 6                      | 60          | 60      | n                                | n                                             |
| Urf 4L           | 293        | 3                  | 6               | 5                      | 50          | 83      | n                                | n                                             |
| Urf A6L          | 205        | 1                  | 2               | 1                      | 50          | 50      | n                                | n                                             |

<sup>a</sup> n means not ranked because the number of sites is so small.

## DISCUSSION

Ours is the most comprehensive comparative study available for complete mitochondrial genomes that are extremely closely related. This provides an opportunity to conduct an examination of the susceptibility of various parts of this genome to genetic change that is relatively free from the problem of multiple substitutions at the same nucleotide position. By contrast, previous comparisons of whole mitochondrial genomes at the sequence level (ANDERSON *et al.* 1981, 1982; BIBB *et al.* 1981) were subject to the multiple-hit problem. Indeed, according to multiple hit calculations (BROWN *et al.* 1982; MIYATA *et al.* 1982), the average silent position has experienced an estimated three substitutions since the divergence of cow, mouse and human mtDNA. In the present study, we have compared genomes for which the average number of silent substitutions is less than 0.03 per silent base pair. We suggest, therefore, that the pattern of sequence divergence inferred from our comparative study of human mtDNA may have several implications for understanding the forces that drive evolutionary change in mtDNA.

To explain the high rate of both point and length mutational divergence in mammalian mtDNA, as compared with the rates in nuclear DNA, one can invoke a general factor that elevates the rate by five- to tenfold at all positions in the mitochondrial genome (CANN and WILSON 1983). Two classes of explanation exist for this general elevation of the evolutionary rate in mtDNA. One appeals to an enhanced mutation pressure that perhaps results from poor fidelity or a lack of editing in mtDNA replication, deficient repair, rapid DNA

TABLE 4  
*Variability in transfer RNAs*

| Transfer RNA | Codon | Variable sites | Constant sites | Total sites |
|--------------|-------|----------------|----------------|-------------|
| 4 Codons     |       |                |                |             |
| Leu          | CUN   | 0              | 3              | 3           |
| Val          | GUN   | 3              | 1              | 4           |
| Ser          | UCN   | 3              | 1              | 4           |
| Pro          | CCN   | 2              | 1              | 3           |
| Thr          | ACN   | 1              | 0              | 1           |
| Ala          | GCN   | 0              | 3              | 3           |
| Arg          | CGN   | 1              | 2              | 3           |
| Gly          | GGN   | 0              | 2              | 2           |
| Sum          |       | 10             | 13             | 23          |
| 2 Codons     |       |                |                |             |
| Leu          | UUR   | 1              | 1              | 2           |
| Met          | AUR   | 1              | 3              | 4           |
| Gln          | CAR   | 0              | 4              | 4           |
| Lys          | AAR   | 0              | 2              | 2           |
| Glu          | GAR   | 0              | 0              | 0           |
| Trp          | UGR   | 1              | 0              | 1           |
| Sum          | (NNR) | 3              | 10             | 13          |
| 2 Codons     |       |                |                |             |
| Phe          | UUY   | 0              | 1              | 1           |
| Ile          | AUY   | 0              | 1              | 1           |
| Tyr          | UAY   | 0              | 2              | 2           |
| His          | CAY   | 0              | 1              | 1           |
| Asn          | AAU   | 0              | 4              | 4           |
| Asp          | GAY   | 0              | 0              | 0           |
| Cys          | UGY   | 0              | 4              | 4           |
| Ser          | AGY   | 0              | 1              | 1           |
| Sum          | (NNY) | 0              | 14             | 14          |

turnover or high oxidant levels (BROWN, GEORGE and WILSON 1979; BROWN *et al.* 1982; BROWN, 1981, 1983). The other appeals to the possibility of a relative lack of a recombinational mechanism by which natural selection could eliminate mildly deleterious mutations that are linked to an advantageous mutation (*cf.* CANN and WILSON 1983).<sup>2</sup> Although fungal mtDNAs recombine, there is no convincing evidence that recombination occurs in mammalian mtDNA except perhaps in the displacement loop (OLIVO *et al.* 1983).

If general factors (*e.g.*, enhanced mutation pressure and lack of recombination) were entirely responsible for the high rate of mtDNA divergence, one would expect the tRNA and rRNA genes of mtDNA to evolve only five to

<sup>2</sup> There is an important difference between our recombinational explanation (for the low rate of nuclear DNA evolution relative to the mtDNA rate) and the one offered by BROWN *et al.* (1984) who suggested that recombination might slow down the rate of accumulation of neutral mutations. We suspect that recombination can have no effect on the neutral evolutionary rate because the DNA sequence incorporated by recombination is as likely as that removed by recombination to harbor neutral mutations (see also TAKAHATA and SLATKIN 1983).

TABLE 5

*Radical amino acid replacements in human mtDNAs as indicated by restriction analysis*

| Protein              | Location in bp | Nature of replacement |                          |
|----------------------|----------------|-----------------------|--------------------------|
|                      |                | Amino acids           | Radicalness <sup>a</sup> |
| Urf 1                | 3391           | Tyr-His               | +                        |
|                      | 3563           | Thr-Ile               | +                        |
| Urf 3                | 10066          | Phe-Cys               | +                        |
|                      | 10084          | Asn-Asp               | -                        |
|                      | 10394          | Thr-Ala               | -                        |
| Urf 4                | 10893          | Asn-Asp               | -                        |
| Urf 5                | 12925          | Pro-Ser               | +                        |
| Urf 6                | 14322          | Asn-Ser               | -                        |
|                      | 14439          | Tyr-Asn               | +                        |
|                      | 14509          | Val-Ala               | -                        |
| ATPase 6             | 8877           | Phe-Leu               | -                        |
| Cytochrome oxidase 2 | 7617           | Asp-Gly               | +                        |
|                      | 7970           | Ser-Pro               | +                        |
| Cytochrome oxidase 3 | 9400           | Ala-Thr               | -                        |
|                      | 9509           | Leu-Phe               | -                        |
|                      | 9859           | Cys-Trp               | +                        |
| Cytochrome <i>b</i>  | 14749          | Thr-Ala               | -                        |
|                      | 15005          | Ala-Asp               | +                        |

<sup>a</sup> Degree of chemical difference based on differences in size, composition and polarity; the plus symbols refer to differences greater than 73, as reported in Table 2 of GRANTHAM (1974).

TABLE 6

*Transitions and transversions inferred from site gains*

| Region (and position in codon) | Total gains |                       | % transversions |                       |
|--------------------------------|-------------|-----------------------|-----------------|-----------------------|
|                                | Observed    | Inferred <sup>a</sup> | Observed        | Inferred <sup>a</sup> |
| Protein (1)                    | 9           | 29                    | 0               | 0                     |
| Protein (2)                    | 6           | 7                     | 33              | 43                    |
| Protein (3)                    | 37          | 63                    | 34              | 28                    |
| Protein (all)                  | 52          | 99                    | 28              | 21                    |
| tRNAs and rRNAs                | 11          | 48                    | 41              | 61                    |
| Noncoding                      | 14          | 57                    | 29              | 7                     |
| All                            | 77          | 204                   | 30              | 26                    |

<sup>a</sup> Inferred by phylogenetic analysis.

TABLE 7

*Base substitutions responsible for site gains in human mtDNA*

| Enzyme                   | Sequence        | No. of sites <sup>a</sup> |             | Gain mutations |  |
|--------------------------|-----------------|---------------------------|-------------|----------------|--|
|                          |                 | Obs/Exp                   | Transitions | Transversions  |  |
| Well-represented sites   |                 |                           |             |                |  |
| <i>AluI</i>              | AGCT            | 63/52                     | 10          | 2              |  |
| <i>DdeI</i>              | CTNAG           | 71/52                     | 4           | 0              |  |
| <i>HaeIII</i>            | GGCC            | 52/28                     | 11          | 2              |  |
| Subtotal                 |                 | 186/132                   | 25          | 4              |  |
| Poorly represented sites |                 |                           |             |                |  |
| <i>AvaII</i>             | GGTCC,<br>GGACC | 8/16                      | 2.5         | 1.5            |  |
| <i>FnuDII</i>            | CGCG            | 6/28                      | 0           | 0              |  |
| <i>HhaI</i>              | GCGC            | 17/28                     | 4           | 2              |  |
| <i>HinfI</i>             | GANTC           | 36/52                     | 7           | 6              |  |
| <i>HpaII</i>             | CCGG            | 23/28                     | 2.5         | 3.5            |  |
| <i>MboI</i>              | GATC            | 23/52                     | 6           | 4              |  |
| <i>RsaI</i>              | GTAC            | 34/52                     | 3           | 1              |  |
| <i>TaqI</i>              | TCGA            | 29/52                     | 4           | 1              |  |
| Subtotal                 |                 | 176/308                   | 29          | 19             |  |

<sup>a</sup> Obs refers to the observed number of sites in Cambridge sequence (ANDERSON *et al.* 1981). Exp refers to the expected number of sites calculated from the base composition of the light strand (24.7% T, 31.2% C, 30.9% A and 13.1% G) of this same mtDNA. The total number of sites observed in this survey of 112 humans (plus the Cambridge sequence) is as follows for each enzyme: 76 (*AluI*), 76 (*DdeI*), 63 (*HaeIII*), 12 (*AvaII*), 6 (*FnuDII*), 23 (*HhaI*), 48 (*HinfI*), 29 (*HpaII*), 33 (*MboI*), 37 (*RsaI*), 34 (*TaqI*).  $\chi^2$  for the two classes of sites is 6.55,  $P < 0.02$ .

ten times faster than their nuclear counterparts. Preliminary studies, however, suggested a much higher rate than expected for these mitochondrial genes (BROWN *et al.* 1982; CANN, BROWN and WILSON 1982), and the divergence pattern documented here for humans and by FERRIS *et al.* (1983b) for mice confirms and extends this result. It is appropriate, therefore, to discuss in detail the possibility that an additional factor, *e.g.*, relaxed constraints on the translation apparatus (BROWN *et al.* 1982; CANN, BROWN and WILSON 1982; BROWN 1983), must be invoked to explain the especially high rate of mitochondrial tRNA and rRNA evolution.

#### *Rate of evolution of the translation apparatus*

The translation apparatus of a small genome, such as animal mtDNA, which encodes only 13 polypeptides (ANDERSON *et al.* 1981), would be expected to function under more relaxed constraints than would a system that translates thousands of kinds of mRNA (BORST and GRIVELL 1981; JUKES 1981; CANN, BROWN and WILSON 1982; BROWN 1983). The constraints could be further relaxed in mitochondria, in which nearly every gene may be represented by many protein products (CHING and ATTARDI 1982; OLIVER, GREENBERG and WALLACE 1983; MARIOTTINI *et al.* 1983); in bacteria and nuclei, however,

there are probably some genes that are represented by only one or a few protein molecules per cell (MCILWAIN 1946). If a mutation were to raise the frequency of a particular error, such as the incorporation of threonine at codons specifying leucine, the functional consequences could be lethal for a complex system, in which there are sure to be some proteins whose function will be severely impaired by misincorporation of even one threonine per polypeptide chain. But it is quite possible, in a small system, that there are no positions in any of the few kinds of proteins synthesized where function would be lost if leucine were replaced by threonine.

There is direct experimental evidence that mutations in two of the three classes of components in the translation apparatus can affect the accuracy, speed and efficiency of translation. We refer to bacterial mutations in tRNAs and ribosomal proteins (GORINO 1974; KURLAND 1979; YARUS 1979, 1982). Comparative structural studies of the interactions between tRNAs and codons emphasize the possible role of tRNAs in translational fidelity (LAUBUDA and PÖRSCHKE 1983). In addition, there is circumstantial evidence from comparative structural studies suggesting that rRNA also has a role in translational proofreading (THOMPSON and HEARST 1983). The fact that two of the rRNA regions implicated in proofreading are expanded in rRNA specified by the nucleus and absent from mitochondrial rRNA (THOMPSON and HEARST 1983; BRIMACOMBE, MALY and ZWEIB 1983) is noteworthy. It can, therefore, be predicted that mutations in any of the three classes of components in the mitochondrial translation apparatus can affect the accuracy, speed and efficiency of translation. If such mutations are more likely to be tolerated in machinery that makes fewer kinds of proteins, one can further predict that the rate of evolutionary change in all three classes of components will be correspondingly higher.

*Ribosomal RNA genes:* This prediction fits with our finding that the rRNA genes of mtDNA are nearly as variable as the noncoding and protein-coding regions of mtDNA. Yet, as is well known from the early work of SINCLAIR and BROWN (1971) and PALLERONI *et al.* (1973), the rRNA genes in nuclei and bacteria are remarkably conservative, a phenomenon that has been useful in defining phylogenetic relationships among different kingdoms of organisms (FOX *et al.* 1980). We calculate that nuclear rRNA gene divergence in vertebrates may be 40 times slower than for an average segment of single copy nuclear DNA. Consider the following case. The rRNA genes of two frog species, *Xenopus laevis* and *Hyla chrysoscelis*, differ by about 1.4% in base sequence (TOIVONEN *et al.* 1983). Their divergence time is at least 150 million years (WALLACE, MAXSON and WILSON 1971; BISBEE *et al.* 1977), from which we estimate a divergence rate of less than 0.01% per million years. [We have made a very similar estimate from comparing the complete nucleotide sequences published for the nuclear 18S rRNA genes of *Xenopus* and *Rattus* by TORCZYNSKI, BOLLON and FUKU (1983).] In contrast, the rate of single-copy DNA divergence for the best studied pair of frog species, *X. laevis* and *X. borealis*, is about 0.4% per million years, this estimate coming from a  $\Delta T_m$  value of 12° and an assumed divergence time of about 30 million years (GALAU *et al.* 1976).

*Transfer RNA genes:* Our survey of restriction site variability in 20 tRNA genes supports the inference, made by BROWN *et al.* (1982) from interspecific sequence comparisons of three tRNA genes, that mitochondrial tRNA sequences diverge at least 100 times faster than nuclear tRNA sequences. During vertebrate evolution, the average rate of nuclear tRNA divergence has been about 100 times slower than single-copy nuclear DNA. By contrast, in human (Table 2) and mouse mtDNAs (FERRIS *et al.* 1983b), the mean rate of tRNA divergence approaches the average rate of divergence for the mitochondrial genome.

*Ribosomal proteins:* Electrophoretic results suggest that mitochondrial ribosomal proteins evolve nearly ten times faster than do the proteins of the conventional ribosomes in the cell sap (MATTHEWS, HESSLER and O'BRIEN 1978). Most of these mitochondrial proteins (>70) must be encoded by nuclear genes, and, thus, their fast evolution is unlikely to be due to enhanced mutation pressure or lack of recombination; it is more likely to be the consequence of an elevated probability of fixation of mutations, which is consistent with either relaxed constraints on the translation apparatus or positive selection for compensating mutations that would permit the rRNA-ribosomal protein complexes to maintain function.

*Contextual constraints in mitochondrial mRNAs:* As LIPMAN and WILBUR (1983) pointed out, the hypothesis of relaxed constraints on the translation apparatus could have the consequence of relaxed constraints at silent sites in mitochondrial mRNAs. They have shown that the bases permitted at such sites are most nearly random for mitochondrial mRNA, bacterial mRNAs being intermediate and vertebrates being the least random in this respect. It is well known from studies of prokaryotic systems that a codon's context, *i.e.*, the nature of its neighboring bases, has an effect on the accuracy of codon translation (GORINI 1974; YARUS 1979; GAVRILOVA, PERMINOVA and SPIRIN 1981). If this is also the case for animal mitochondria, the high rate of silent substitution in mitochondrial genes coding for proteins may well be due, in part, to relaxed constraints on the translation apparatus. Nevertheless, we suggest that this effect would be small because nuclear pseudogenes, which presumably lack contextual constraints, evolve only slightly faster than the silent rate for functional nuclear genes and much more slowly than the silent rate for mitochondrial genes (BROWN *et al.* 1982; MIYATA *et al.* 1982).

Relaxed contextual constraints might also be expected to raise the acceptability of amino acid replacements by a small factor. Our evidence that six mitochondrially encoded proteins have incurred multiple amino acid replacements during diversification of the human gene pool is interesting in this regard, especially when considered in relation to the proportion of radical replacements. This proportion is slightly higher for human mitochondrial proteins than for fibrinopeptides, lysozymes, globins, carbonic anhydrases and insulins (R. L. CANN and A. C. WILSON, unpublished calculations).

Thus, the high rate of evolutionary change in mammalian mtDNA is probably the result of a blending of two forces. One could be increased mutation pressure and/or the lack of recombination, both of which would enhance the frequency of change at all positions. The other could be relaxed translational

constraints, which would have a major effect on components of the translation machinery and a minor effect on the mitochondrial genes coding for proteins.

*Coevolution of cytochrome oxidase II and cytochrome c*

The fact that subunit II of cytochrome oxidase is highly variable among humans (Table 3) is indicative of a recent change in the tempo of evolution in one region of the mitochondrial genome. Low-resolution mapping suggests that this gene has also been highly variable in apes (FERRIS, WILSON and BROWN 1981; FERRIS *et al.* 1981) but conservative in rodents (BROWN and SIMPSON 1981). High-resolution mapping (FERRIS *et al.* 1983b) and heteroduplex mapping (CHRISTIANSEN and CHRISTIANSEN 1983) confirm that rodents have undergone relatively little evolutionary change in this region.

Reinforcement for this view comes from phylogenetic analysis of the sequences published for the cytochrome oxidase II region of human, mouse, rat and cow, as shown and referenced in Figure 3. This figure shows the number of amino acid substitutions, inferred by parsimony analysis, fixed along the lineages leading from a common ancestor to the present day species. Since divergence, 57 substitutions are estimated to have accumulated along the primate lineage but only eight to 14 on the other mammalian lineages. This deviation from an expectation of the molecular clock hypothesis (WILSON, CARLSON and WHITE 1977) was recognized by BROWN and SIMPSON (1982) and BROWN *et al.* (1983), and the analysis in Figure 3 emphasizes its magnitude.

Only one other mitochondrial gene seems to exhibit faster evolution in primates than in rodents. For cytochrome *b*, the ratio of amino acid replace-

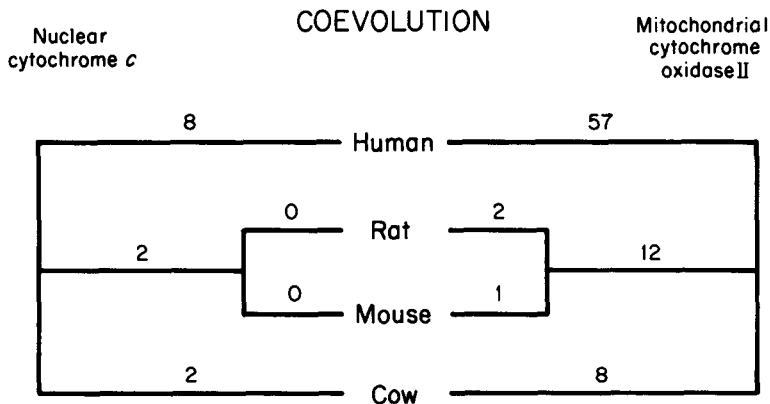

FIGURE 3.—Phylogenetic distribution of amino acid replacements in cytochrome *c* and subunit II of cytochrome oxidase. The apportioning of base substitutions causing amino acid differences was based on the parsimony principle, using directly determined amino acid sequences of cytochromes *c* (DAYHOFF 1972, CARLSON *et al.* 1977) and nucleotide sequences for the cytochrome oxidase II gene (ANDERSON *et al.* 1981, 1982; BIBB *et al.* 1981; BROWN and SIMPSON 1982). We chose not to apportion such substitutions whenever two or more equally parsimonious solutions were available at a given position. Seven of the 87 substitutions needed to account for the amino acid differences among the four oxidase subunits were in this ambiguous category and do not appear in the figure.



ments in the primate lineage to that in the nonprimate lineages is about 2, a smaller value than is observed for subunit 2 of cytochrome oxidase.

Also evident from Figure 3 is a strong suggestion for coevolution between specific nuclear and mitochondrial genes. Cytochrome *c*, the protein that receives electrons indirectly from cytochrome *b* and passes them directly to the cytochrome oxidase II subunit *in vivo*, has long been known to have undergone faster evolution in primates than in rodents (CARLSON *et al.* 1977).

In addition, cytochrome *c* and cytochrome oxidase have undergone complementary functional changes away from the ancestral mammalian state in the lineage leading to higher primates. In tests with purified components, the cytochrome *c* and the cytochrome oxidase of higher primates react well with each other but poorly with cytochrome oxidase and cytochrome *c* from nonprimates (OSHEROFF *et al.* 1983). This is the first probable instance of coevolution between nuclear and cytoplasmic genes whose products interact directly and in which the coevolution is evident at the levels of both function and primary structure.

There is another case for coevolution between nuclear and mitochondrial genes. This involves the mitochondrial rRNA genes and the nuclear genes coding for proteins in the mitochondrial ribosomes. The apparently high rate for these proteins, relative to that for the proteins in conventional ribosomes (MATTHEWS, HESSLER and O'BRIEN 1978), could be due to coevolution with the rapidly evolving rRNA genes in mtDNA. However, functional tests to complement these evolutionary rate comparisons have not been performed. We also emphasize the need to document the apparent rates of ribosomal protein evolution by primary structural analysis, since the differences observed in two-dimensional gels (MATTHEWS, HESSLER and O'BRIEN 1978) could be the result of posttranslational modifications rather than amino acid replacements.

An additional distinct feature of the cytochrome example, as compared with the ribosomal example, is that the factor responsible for the accelerated evolution in the primate lineage appears to be unique to the mitochondria of higher primates rather than to animal mitochondria in general. This elevation cannot be ascribed to a general factor (*e.g.*, increased mutation pressure), because only one gene is strongly affected. The implication is that the accelerated evolution of cytochrome oxidase subunit 2 must be explained in terms of the relaxation of a functional constraint specific to this gene.

#### *Transitions and transversions at restriction sites*

The low ratio of transitions to transversions inferred from restriction site gains (Table 7) suggests either that the human population has experienced an unusual type of evolution or that restriction sites are unusual in this respect. The restriction sites surveyed here have atypical base sequences; in addition to containing a high level of G and C, these sites are palindromic and, therefore, have the same base composition on the two strands of DNA. Typical vertebrate mitochondrial sequences, by contrast, differ from restriction sites by exhibiting strand bias and having a relatively low content of G and C

(BROWN 1983). The facts that most types of restriction sites are underrepresented in human mtDNA, even after correction has been made for its base composition and strand bias (see Table 7), and that their distribution is non-random (ADAMS and ROTHMAN 1982) may be considered reasons for expecting them to exhibit unusual evolutionary behavior.

The sequencing of numerous segments of mitochondrial coding regions from a few human individuals will allow a choice between these alternative explanations for the low ratio of transitions to transversions observed at most restriction sites in human mtDNA. Such studies have already been done on two regions of human mtDNA (GREENBERG, NEWBOLD and SUGINO 1983; OLIVER, GREENBERG and WALLACE 1983), and preliminary sequencing observations at Berkeley (R. L. CANN, unpublished results) on four additional regions hint strongly that it is the restriction sites that are unusual as regards the ratio of transitions to transversions. High-resolution mapping comparisons of mouse mtDNAs are also suggestive of a low ratio of transitions to transversions at many restriction sites (FERRIS *et al.* 1983b). The possibility of a special functional role or sensitivity to mutagenesis for certain palindromic regions containing high levels of guanine and cytosine, therefore, deserves to be explored.

We thank R. BUTOW, T. FOX, U. GYLLENSTEN, J. HIXSON, M. MCCLELLAND, P. PERLMAN, E. PRAGER, M. STONEKING, R. T. WHITE and E. ZIMMER for helpful comments. We were assisted in gathering materials for this study by L. FREEDMAN, M. GEORGE, JR., D. DOBSON, R. CREASY, K. GOTTLIEB, and B. GREENBERG, along with new mothers and the staff in Labor and Delivery at the following hospitals: Kaiser Permanente (Oakland and Walnut Creek), Stanford Medical Center (Stanford), Alta Bates (Berkeley) and Moffitt (University of California, San Francisco). This work was supported by grants from the Chancellor's Patent Fund (R. L. C.), the Lowie Anthropology Fund (R. L. C.), the Foundation for Research on the Origin of Man (R. L. C.), National Institutes of Health GM30144 (W. M. B.) and National Science Foundation DEB81-12412 (A. C. W.).

#### LITERATURE CITED

- ADAMS, J. and E. D. ROTHMAN, 1982 Estimation of phylogenetic relationships from DNA restriction patterns and selection of endonuclease cleavage sites. *Proc. Natl. Acad. Sci. USA* **79**: 3560-3564.
- ANDERSON, S., A. T. BANKIER, B. G. BARRELL, M. H. L. DE BRUIJN, A. R. COULSON, J. DROUIN, I. C. EPERON, D. P. NIERLICH, B. A. ROE, F. SANGER, P. H. SCHREIER, A. J. H. SMITH, R. STADEN and I. G. YOUNG, 1981 Sequence and organization of the human mitochondrial genome. *Nature* **290**: 457-465.
- ANDERSON, S., M. H. L. DE BRUIJN, A. R. COULSON, I. C. EPERON, F. SANGER and I. G. YOUNG, 1982 The complete sequence of bovine mitochondrial DNA: conserved features of the mammalian mitochondrial genome. *J. Mol. Biol.* **156**: 683-717.
- BIBB, M. J., R. A. VAN ETTEN, C. T. WRIGHT, M. W. WALBERG and D. A. CLAYTON, 1981 Sequence and gene organization of mouse mitochondrial DNA. *Cell* **26**: 167-180.
- BISBEE, C. A., M. A. BAKER, A. C. WILSON, I. HADJI-AZIMI and M. FISCHBERG, 1977 Albumin phylogeny for clawed frogs (*Xenopus*). *Science* **195**: 785-787.
- BORST, P. and L. A. GRIVELL, 1981 Small is beautiful—portrait of a mitochondrial genome. *Nature* **290**: 443-444.
- BRIMACOMBE, R., P. MALY and C. ZWEIB, 1983 The structure of ribosomal RNA and its organization relative to ribosomal protein. *Prog. Nucleic Acid Res. Mol. Biol.* **28**: 1-48.

- BROWN, G. G., G. BELL, L. DESROSIERS and R. PRUSSICK, 1984 Variation in animal mitochondrial genes and gene products. In: *Endocytobiology*, II, Edited by W. SCHWEMLER and H. SCHENK. Walter de Gruyter and Company, Berlin. In press.
- BROWN, G. G. and M. V. SIMPSON, 1981 Intra- and interspecific variation of the mitochondrial genome in *Rattus norvegicus* and *Rattus rattus*. *Genetics* **97**: 125–143.
- BROWN, G. G. and M. V. SIMPSON, 1982 Novel features of animal mtDNA evolution as shown by sequences of two rat cytochrome oxidase subunit II genes. *Proc. Natl. Acad. Sci. USA* **79**: 3246–3250.
- BROWN, W. M., 1980 Polymorphism in mitochondrial DNA of humans as revealed by restriction endonuclease analysis. *Proc. Natl. Acad. Sci. USA* **77**: 3605–3609.
- BROWN, W. M., 1981 Mechanisms of evolution in animal mitochondrial DNA. *Ann. NY Acad. Sci.* **361**: 119–134.
- BROWN, W. M., 1983 Evolution of animal mitochondrial DNA. pp. 62–88. In: *Evolution of Genes and Proteins*, Edited by M. NEI and R. KOEHN. Sinauer, Sunderland, Massachusetts.
- BROWN, W. M., M. GEORGE, JR. and A. C. WILSON, 1979 Rapid evolution of animal mitochondrial DNA. *Proc. Natl. Acad. Sci. USA* **76**: 1967–1971.
- BROWN, W. M., E. M. PRAGER, A. WANG and A. C. WILSON, 1982 Mitochondrial DNA sequences of primates: tempo and mode of evolution. *J. Mol. Evol.* **18**: 225–239.
- CANN, R. L., 1982 The evolution of human mitochondrial DNA. Ph.D. Thesis, University of California, Berkeley, California.
- CANN, R. L., W. M. BROWN and A. C. WILSON, 1982 Evolution of human mitochondrial DNA: a preliminary report. pp. 157–165. In: *Human Genetics, Part A: The Unfolding Genome*, Edited by B. BONNÉ-TAMIR, P. COHEN and R. N. GOODMAN. Alan R. Liss, New York.
- CANN, R. L. and A. C. WILSON, 1983 Length mutations in human mitochondrial DNA. *Genetics* **104**: 699–711.
- CARLSON, S. S., G. A. MROSS, A. C. WILSON, R. T. MEAD, L. D. WOLIN, S. F. BOWERS, N. T. FOLEY, A. O. MUIJSERS and E. MARGOLIASH, 1977 Primary structure of mouse, rat, and guinea pig cytochrome c. *Biochemistry* **16**: 1437–1442.
- CHING, E. and G. ATTARDI, 1982 High-resolution electrophoretic fractionation and partial characterization of the mitochondrial translation products from HeLa cells. *Biochemistry* **21**: 3188–3195.
- CHRISTIANSEN, G. and C. CHRISTIANSEN, 1983 Heterology of mitochondrial DNA from mammals detected by electron microscopic heteroduplex analyses. *Nucleic Acids Res.* **11**: 37–56.
- DAYHOFF, M. O., 1972 *Atlas of Protein Sequence and Structure*. National Biomedical Research Foundation, Washington, DC.
- DROUIN, J. and R. H. SYMONS, 1979 Cloning of human mitochondrial DNA. pp. 471–484. In: *ICN-UCLA Symposium Proceedings on Extrachromosomal DNA*, Vol. 15, Edited by D. CUMMINGS, P. BORST, I. DAWID, S. WEISSMAN and C. FOX. Academic Press, New York.
- FERRIS, S. D., W. M. BROWN, W. S. DAVIDSON and A. C. WILSON, 1981 Extensive polymorphism in the mitochondrial DNA of apes. *Proc. Natl. Acad. Sci. USA* **78**: 6319–6323.
- FERRIS, S. D., U. RITTE, K. FISCHER LINDAHL, E. M. PRAGER and A. C. WILSON, 1983a Unusual type of mitochondrial DNA in mice lacking a maternally transmitted antigen. *Nucleic Acids Res.* **11**: 2917–2926.
- FERRIS, S. D., R. D. SAGE, E. M. PRAGER, U. RITTE and A. C. WILSON, 1983b Mitochondrial DNA evolution in mice. *Genetics* **105**: 681–721.
- FERRIS, S. D., A. C. WILSON and W. M. BROWN, 1981 Evolutionary tree for apes and humans based on cleavage maps of mitochondrial DNA. *Proc. Natl. Acad. Sci. USA* **78**: 2432–2436.

- FOX, G. E., E. STACKEBRANDT, R. B. HESPELL, J. GIBSON, J. MANILOFF, T. A. DYER, R. S. WOLFE, W. E. BALCH, R. S. TANNER, L. J. MAGRUM, L. B. ZABLEN, R. BLAKEMORE, R. GUPTA, L. BONEN, B. J. LEWIS, D. A. STAHL, K. R. LUEHRSEN, K. N. CHEN and C. R. WOESE, 1980 The phylogeny of prokaryotes. *Science* **209**: 457–463.
- GALAU, G. A., M. E. CHAMBERLAIN, B. R. HOUGH, R. J. BRITTEN and E. H. DAVIDSON, 1976 Evolution of repetitive and non-repetitive DNA. pp. 200–224. In: *Molecular Evolution*, Edited by F. AYALA. Sinauer, Sunderland, Massachusetts.
- GAVRILOVA, L. P., I. N. PERMINOVA and A. S. SPIRIN, 1981 Elongation factor Tu can reduce translation errors in poly(U)-directed cell-free systems. *J. Mol. Biol.* **149**: 69–78.
- GORINI, L., 1974 Streptomycin and misreading of the genetic code. pp. 791–803. In: *Ribosomes*, Edited by M. NOMURA, A. TISSIÈRES and P. LENGYEL. Cold Spring Harbor Laboratory, New York.
- GRANTHAM, R., 1974 Amino acid difference formula to help explain protein evolution. *Science* **185**: 862–864.
- GREENBERG, B. D., J. E. NEWBOLD and A. SUGINO, 1983 Intraspecific nucleotide sequence variability surrounding the origin of replication in human mitochondrial DNA. *Gene* **21**: 33–49.
- JUKES, T. H., 1981 Amino acid codes in mitochondria as possible clues to primitive codes. *J. Mol. Evol.* **18**: 15–17.
- KURLAND, C. G., 1979 Reading frame errors on ribosomes. pp. 97–108. In: *Nonsense Mutations and tRNA Suppressors*, Edited by J. E. CELIS and J. D. SMITH. Academic Press, New York.
- LABUDA, D. and D. PÖRSCHKE, 1983 Codon-induced transfer RNA association. *J. Mol. Biol.* **167**: 205–209.
- LIPMAN, D. and W. J. WILBUR, 1983 Contextual constraints on synonymous codon choice. *J. Mol. Biol.* **163**: 363–376.
- MANIATIS, T., E. F. FRITSCH AND J. SAMBROOK, 1982 *Molecular Cloning*. Cold Spring Harbor Laboratory, New York.
- MARIOTTINI, P., A. CHOMYN, G. ATTARDI, D. TROVATO, D. D. STRONG and R. F. DOOLITTLE, 1983 Antibodies against synthetic polypeptides reveal that the unidentified reading frame A6L<sub>3</sub> overlapping the ATPase 6 gene, is expressed in human mitochondria. *Cell* **32**: 1269–1277.
- MATTHEWS, D. E., R. A. HESSLER and T. W. O'BRIEN, 1978 Rapid evolutionary divergence of proteins in mammalian mitochondrial ribosomes. *FEBS Lett.* **86**: 76–80.
- MCILWAIN, H., 1946 The magnitude of microbial reactions involving vitamin-like compounds. *Nature* **158**: 898–902.
- MIYATA, T., H. HAYASHIDA, R. KIKUNO, M. HASEGAWA, M. KOBAYASHI and K. KOIKE, 1982 Molecular clock of silent substitutions: at least six-fold preponderance of silent changes in mitochondrial genes over those in nuclear genes. *J. Mol. Evol.* **19**: 28–35.
- OLIVER, N. A., B. D. GREENBERG and D. C. WALLACE, 1983 Assignment of a polymorphic polypeptide to the human mitochondrial DNA unidentified reading frame 3 gene by a new peptide mapping strategy. *J. Biol. Chem.* **258**: 5834–5839.
- OLIVO, P. D., M. J. VAN DE WALLE, P. J. LAIPIS and W. W. HAUSWIRTH, 1983 Patterns of base substitution suggest bovine mitochondrial DNA D-loop sequences are generated by gene conversion. *Nature* **306**: 400–402.
- OSHEROFF, N., S. H. SPECK, E. MARGOLIASH, E. C. I. VEERMAN, J. WILMS, B. W. KÖNIG and A. O. MUIJSERS, 1983 The reaction of primate cytochromes c with cytochrome c oxidase. *J. Biol. Chem.* **258**: 5731–5738.
- PALLERONI, N. J., R. KUNISAWA, R. CONTOPOULOU and M. DOUDOROFF, 1973 Nucleic acid homologies in the genus *Pseudomonas*. *Int. J. Syst. Bacteriol.* **23**: 333–339.

- SINCLAIR, J. H. and D. D. BROWN, 1971 Retention of common nucleotide sequences in the ribosomal DNA of eukaryotes and some of their physical characteristics. *Biochemistry* **10**: 2761–2769.
- TAKAHATA, N. and M. SLATKIN, 1983 Evolutionary dynamics of extranuclear genes. *Genet. Res.* In press.
- THOMPSON, J. F. and J. E. HEARST, 1983 Structure-function relations in *E. coli* 16S RNA. *Cell* **33**: 19–24.
- TOIVONEN, L. A., D. T. CROWE, R. J. DETRICK, S. W. KLEMMANN and J. C. VAUGHN, 1983 Ribosomal RNA gene number and sequence divergence in the diploid-tetraploid species pair of North American hylid tree frogs. *Biochem. Genet.* **21**: 299–308.
- TORCZYNSKI, R., A. P. BOLLON and M. FUKU, 1983 Complete nucleotide sequence of rat 18S ribosomal RNA gene and comparison with the respective yeast and frog genes. *Nucleic Acids Res.* **11**: 4879–4890.
- WALLACE, D. G., L. R. MAXSON and A. C. WILSON, 1971 Albumin evolution in frogs: a test of the evolutionary clock hypothesis. *Proc. Natl. Acad. Sci. USA* **68**: 3127–3129.
- WILSON, A. C., S. S. CARLSON and T. J. WHITE, 1977 Biochemical evolution. *Annu. Rev. Biochem.* **46**: 573–639.
- YARUS, M., 1979 The accuracy of translation. *Prog. Nucleic Acid Res. Mol. Biol.* **23**: 195–225.
- YARUS, M., 1982 Translational efficiency of transfer RNAs: uses of an extended anticodon. *Cell* **32**: 1269–1277.

Corresponding editor: M. NEI
